# Supplementary material for: Assessing the community-level impact of a decade of user fee policy shifts on health facility deliveries in Kenya, 2003-2014
Source: Springer Nature journal article supplement (doi:10.1186/s12939-018-0774-4), 2018-05-25
Supplement: MOESM1 [file 15793094]

Additional file 1 Actual and predicted trends in public facility, private facility and home-based deliveries among all women following 2004, 2007, and 2013 user fee policy shifts

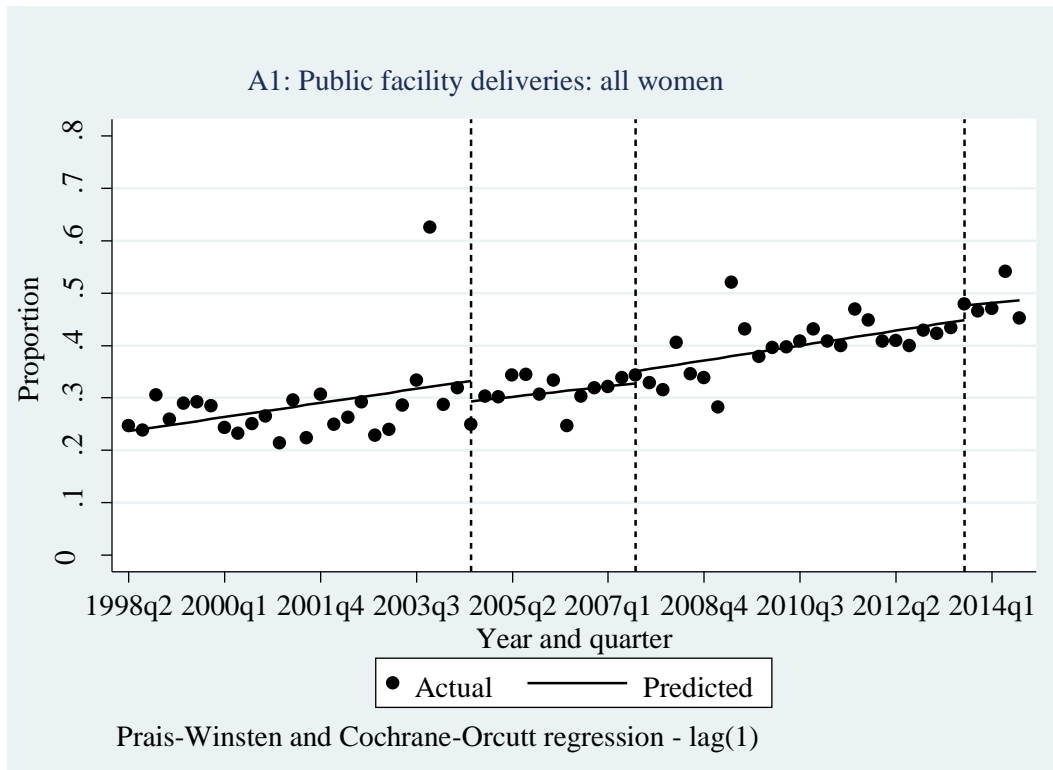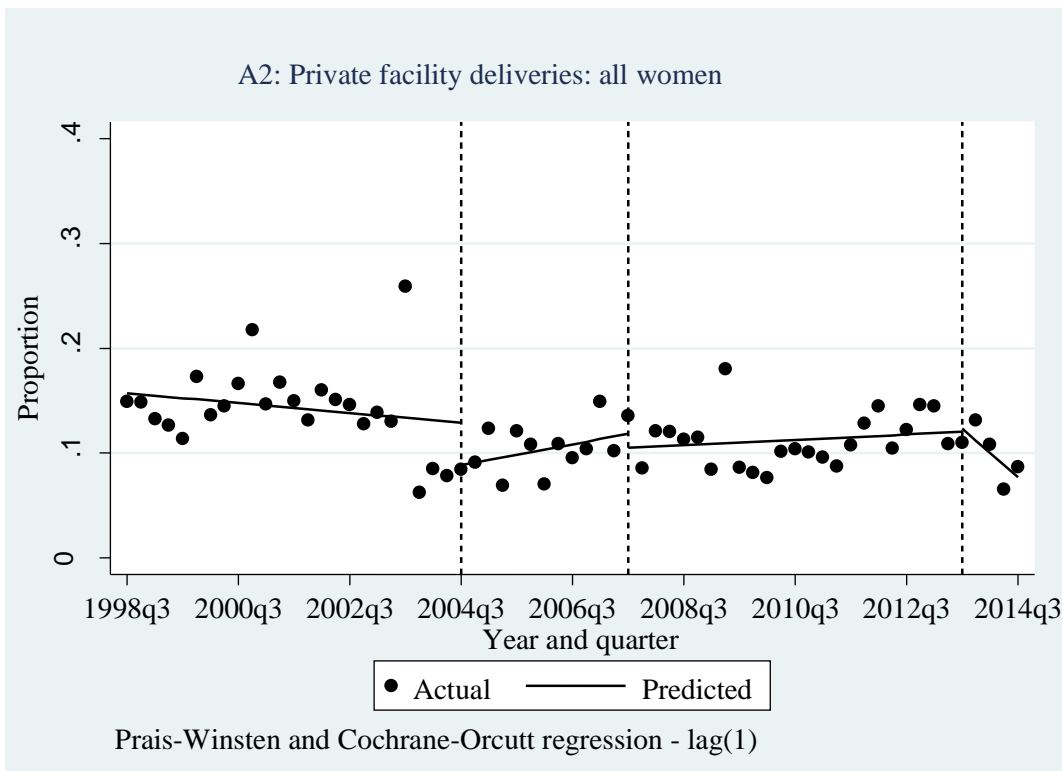

A3: Home deliveries: all women

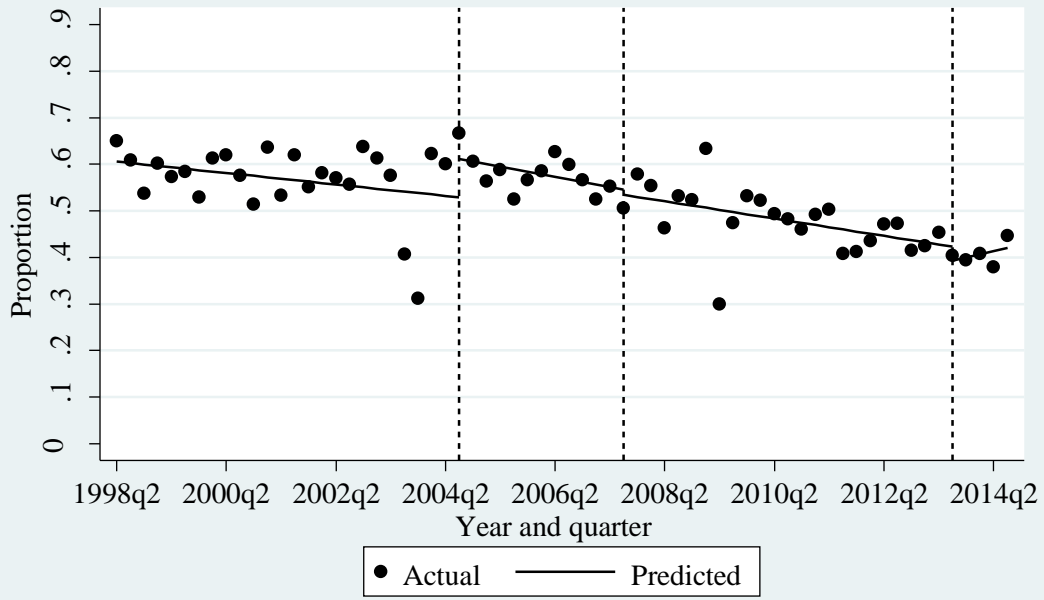

Prais-Winsten and Cochrane-Orcutt regression - lag(1)
